# Supplementary material for: Semaglutide in HFpEF across obesity class and by body weight reduction: a prespecified analysis of the STEP-HFpEF trial
Source: PubMed Central journal article supplement (PMC10504076; doi:10.1038/s41591-023-02526-x), 2023-08-27
Supplement: 41591_2023_2526_MOESM1_ESM.pdf [file 41591_2023_2526_MOESM1_ESM.pdf]

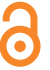

---

# **Semaglutide in HFpEF across obesity class and by body weight reduction: a prespecified analysis of the STEP-HFpEF trial**

---

In the format provided by the authors and unedited

---

**Contents page**

**List of clinical sites in the STEP-HFpEF trial ..... 2**

**Supplementary Table 1: Regression Analysis of Baseline BMI (Continuous) and Baseline Endpoint Assessments (Prior to Treatment)..... 6**

## List of clinical sites in the STEP-HFpEF trial

| Site number | Country        | Organization                                                                          |
|-------------|----------------|---------------------------------------------------------------------------------------|
| 101         | Argentina      | Sanatorio Britanico S.A.                                                              |
| 102         | Argentina      | Centro de Investigación y Prevención Cardiovascular                                   |
| 103         | Argentina      | Instituto de Cardiología de Corrientes                                                |
| 104         | Argentina      | Consultorio Integral de Atención al Diabético                                         |
| 105         | Argentina      | CEMEDIC                                                                               |
| 106         | Argentina      | Cardiología Palermo                                                                   |
| 150         | Australia      | Geelong Cardiology Research Unit                                                      |
| 151         | Australia      | Concord Repatriation General Hospital - Cardiology                                    |
| 152         | Australia      | Liverpool Hospital                                                                    |
| 153         | Australia      | The Canberra Hospital_Garran                                                          |
| 154         | Australia      | Flinders Medical Centre                                                               |
| 201         | Canada         | Dr James Cha                                                                          |
| 202         | Canada         | Cambridge Cardiac Care Centre                                                         |
| 203         | Canada         | Institut Universitaire de Cardiologie et de Pneumologie. de Quebec - Universite Laval |
| 204         | Canada         | Heart Health Institute Research, Inc.                                                 |
| 205         | Canada         | Dr. Louis Yao                                                                         |
| 206         | Canada         | Oakville Cardiovascular Research LP                                                   |
| 209         | Canada         | Partnrs Adv Cardio Eval (PACE)                                                        |
| 250         | Czech Republic | Vseobecna fakultni nemocnice a 1 LF UK v Praze                                        |
| 251         | Czech Republic | IKEM                                                                                  |
| 252         | Czech Republic | Nemocnice Jihlava Kardiologie                                                         |
| 254         | Czech Republic | Poliklinika Holešovice VISIONARY - Medicon Pharm s.r.o.                               |
| 255         | Czech Republic | Nemocnice Slany Kardiologie                                                           |
| 300         | Germany        | Hausaerztlich-Kardiologisches MVZ Am Felsenkeller GmbH                                |
| 301         | Germany        | Appel                                                                                 |
| 302         | Germany        | MVZ CCB Frankfurt Und Main-Taunus GbR                                                 |
| 303         | Germany        | Universitätsklinikum Wurzburg AöR                                                     |
| 304         | Germany        | Medical Center - University Of Freiburg                                               |

|     |             |                                                                                             |
|-----|-------------|---------------------------------------------------------------------------------------------|
| 305 | Germany     | Charite Universitatsmedizin Berlin KöR                                                      |
| 306 | Germany     | Zentrum fuer klinische Studien Suedbrandenburg GmbH                                         |
| 350 | Denmark     | Herlev og Gentofte Hospital                                                                 |
| 351 | Denmark     | Kardiologisk Odense & Svendborg                                                             |
| 352 | Denmark     | Aarhus Universitetshospital, Skejby Hjertesygdomme                                          |
| 401 | Hungary     | Semmelweis Egyetem Városmajori Szív- és Érgyógyászat                                        |
| 402 | Hungary     | Zala Megyei Szent Rafael Kórház                                                             |
| 403 | Hungary     | Borsod-Abaúj-Zemplén Megyei Központi Kórház                                                 |
| 404 | Hungary     | Jahn Ferenc Dél-pesti Kórház és Rendelőintézet                                              |
| 405 | Hungary     | Szent Margit Rendelőintézet Nonprofit Kft.                                                  |
| 407 | Hungary     | Semmelweis Egyetem Szent Rókus Klinikai Tömb                                                |
| 408 | Hungary     | Lausmed Kft.                                                                                |
| 409 | Hungary     | Selye János Kórház                                                                          |
| 451 | Israel      | Cardio Vascular Research Center Sourasky MC                                                 |
| 452 | Israel      | Sheba Medica Center - Clinical Research Unit                                                |
| 453 | Israel      | Heart Failure Unit, Rabin Medical Center - Beilinson Campus                                 |
| 454 | Israel      | Hadassah MC - Cardio                                                                        |
| 455 | Israel      | Cardiology department, Western Galilee Medical Center                                       |
| 500 | Netherlands | UMC Groningen                                                                               |
| 501 | Netherlands | Gelre Ziekenhuizen Apeldoorn                                                                |
| 502 | Netherlands | Medisch Centrum Leeuwarden                                                                  |
| 503 | Netherlands | Saxenburgh Medisch Centrum                                                                  |
| 504 | Netherlands | Rode Kruis Ziekenhuis Beverwijk                                                             |
| 505 | Netherlands | Bravis Ziekenhuis                                                                           |
| 550 | Poland      | Uniwersytecki Szpital Kliniczny Im Wojskowej Akademii Medycznej Centralny Szpital Weteranow |
| 551 | Poland      | I Katedra i Klinika Kardiologii WUM SPCSK                                                   |
| 552 | Poland      | Ind. Prak. Lek. w dziedz. Kardiologii lek. med. K. Cymerman                                 |
| 553 | Poland      | Uniwersytecki Szpital Kliniczny w Białymstoku K. Kardio                                     |
| 554 | Poland      | Pro Familia Altera Sp. z o.o.                                                               |
| 555 | Poland      | Malopolskie Centrum Sercowo-Naczyniowe                                                      |
| 601 | Spain       | Hospital Clínico Universitario de Valencia                                                  |

|     |                |                                                                      |
|-----|----------------|----------------------------------------------------------------------|
| 602 | Spain          | Complejo Hospitalario Universitario de Santiago                      |
| 603 | Spain          | Hospital Universitario La Zarzuela                                   |
| 650 | United Kingdom | Glasgow Clinical Research Facility                                   |
| 651 | United Kingdom | Manchester Royal Infirmary_Manchester_0                              |
| 652 | United Kingdom | Queen Elizabeth University Hospital                                  |
| 653 | United Kingdom | Ninewells Hospital                                                   |
| 654 | United Kingdom | Wycombe General Hospital                                             |
| 655 | United Kingdom | St. Richards Hospital                                                |
| 656 | United Kingdom | Great Western Hospital                                               |
| 657 | United Kingdom | Southmead Hospital                                                   |
| 658 | United Kingdom | University Hospital Aintree                                          |
| 701 | United States  | Chicago Medical Research LLC                                         |
| 703 | United States  | Saint Luke's Hospital of Kansas City                                 |
| 704 | United States  | Eastern Shore Rsrch Inst, LLC                                        |
| 705 | United States  | St Louis Heart & Vascular, P.C.                                      |
| 706 | United States  | NY Presbyt Hosp-W Cornell Med                                        |
| 707 | United States  | Wake Forest School of Medicine                                       |
| 708 | United States  | Northwest Heart Clinical Research, LLC                               |
| 709 | United States  | St Francis Hospital Lindner Research Center                          |
| 710 | United States  | CHI Health Clinic Cardiology (CUMC - Bergan Mercy)                   |
| 711 | United States  | The Lindner Center for Research and Education at The Christ Hospital |
| 712 | United States  | Keck Medical Center of USC - Outpatient Clinic                       |
| 714 | United States  | Virginia Heart                                                       |
| 717 | United States  | John Hopkins Hospital                                                |
| 718 | United States  | Univ of Mississippi Med Ctr                                          |
| 719 | United States  | Cotton-O'Neil Heart Center                                           |
| 720 | United States  | Baptist Heart Specialists_Jacksonville                               |
| 721 | United States  | Hospital of the University of Pennsylvania                           |
| 722 | United States  | Northwestern University_Chicago_0                                    |
| 723 | United States  | Ascension St. Vincent Medical Group                                  |
| 730 | United States  | Baptist Health Louisville                                            |

|     |               |                                                 |
|-----|---------------|-------------------------------------------------|
| 731 | United States | Louisiana Heart Center                          |
| 732 | United States | Bryan Heart                                     |
| 734 | United States | The Research Group of Lexington LLC             |
| 735 | United States | Grace Research, LLC                             |
| 736 | United States | Grace Research, LLC_Shreveport                  |
| 737 | United States | University of Texas Southwestern Medical Center |

**Supplementary Table 1: Regression Analysis of Baseline BMI (Continuous) and Baseline Endpoint Assessments (Prior to Treatment)**

|                                 | Predicted change per 1 kg/m <sup>2</sup> increase in Body Mass Index (BMI) |          |                      |          |
|---------------------------------|----------------------------------------------------------------------------|----------|----------------------|----------|
|                                 | Model 1 (Univariate)                                                       |          | Model 2*             |          |
|                                 | Slope (95% CI)                                                             | <i>P</i> | Slope (95% CI)       | <i>P</i> |
| KCCQ-CSS (points)               | -0.84 [-1.08; -0.59]                                                       | <0.0001  | -0.66 [-0.92; -0.40] | <0.0001  |
| 6MWD (m)                        | -4.52 [-5.76; -3.28]                                                       | <0.0001  | -5.40 [-6.62; -4.19] | <0.0001  |
| CRP (geometric mean ratio)      | 1.04 [1.03; 1.06]                                                          | <0.0001  | 1.03 [1.02; 1.05]    | <0.0001  |
| NTproBNP (geometric mean ratio) | 0.99 [0.98; 1.01]                                                          | 0.361    | 1.00 [0.99; 1.01]    | 0.743    |

Data are point estimates and 95% confidence intervals, computed using linear or multivariable regression analyses; *P* values are two-sided.

\*Model 2 adjusted for baseline age, sex, history of atrial fibrillation, history of coronary artery disease, and NYHA class

6MWD, 6 minute walk distance; BMI, body mass index; CI, confidence interval; CRP, C-reactive protein; KCCQ-CSS, Kansas City Cardiomyopathy Questionnaire Clinical Summary Score; ; NTproBNP, N-terminal pro-Brain natriuretic peptide; SBP, systolic blood pressure.
